# Supplementary material
Source: PubMed Central journal article supplement (PMC6439861)

## Supplementary Online Content

Stijns RCH, de Graaf EJR, Punt CJA, et al; CARTS Study Group. Long-term oncological and functional outcomes of chemoradiotherapy followed by organ-sparing transanal endoscopic microsurgery for distal rectal cancer: the CARTS Study. *JAMA Surg*. Published online October 10, 2018. doi:10.1001/jamasurg.2018.3752

**eFigure.** CONSORT diagram

This supplementary material has been provided by the authors to give readers additional information about their work.

eFigure. CONSORT diagram

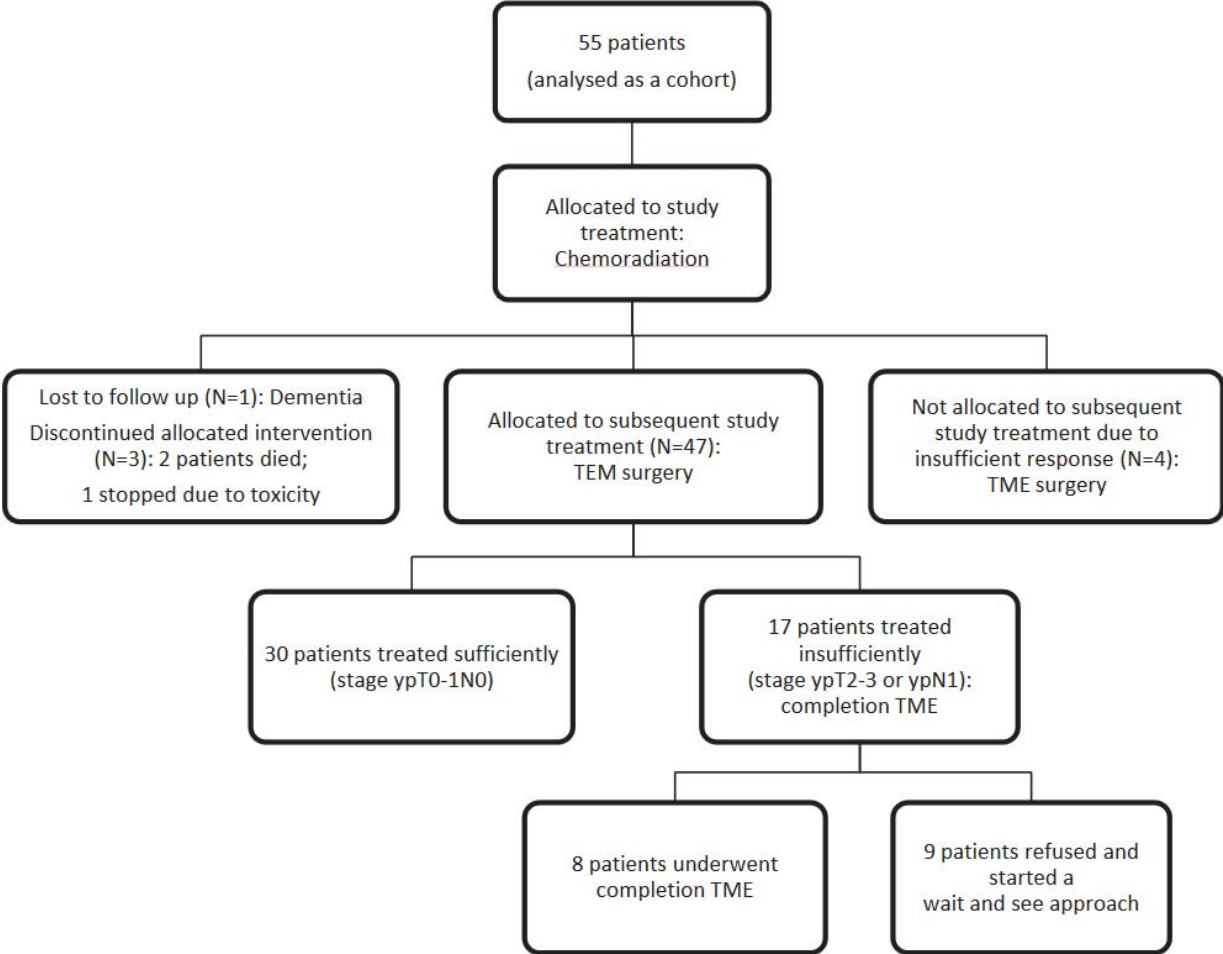

Supplement: jamasurg-154-47-s002.pdf [file jamasurg-154-47-s002.pdf]
